# Supplementary material for: DockTope: a Web-based tool for automated pMHC-I modelling
Source: PubMed Central journal article supplement (PMC4682062; doi:10.1038/srep18413), 2015-12-17
Supplement: srep18413-s1.pdf [file srep18413-s1.pdf]

**DockTope: a Web-based tool for automated pMHC-I modelling.**

Maurício Menegatti Rigo,

Dinler Amaral Antunes,

Martela Vaz de Freitas,

Marcus Fabiano de Almeida Mendes,

Lindolfo Meira,

Marialva Sinigaglia,

Gustavo Fioravanti Vieira.

**Supplementary Figure S1.** pMHC-I complex construction process employed by DockTope. In (A), the MHC donor and the epitope pattern were obtained for each allotype (Table 1 of the manuscript for details). In (B), the full automated process. The automation follows a sequence of steps: (a) structural alignment between the target and the modeled epitope, (b) first molecular docking between the MHC-I and the modeled epitope, (c) energy minimization, (d) separation of MHC-I and modeled epitope and (e) second molecular docking as a final refinement.

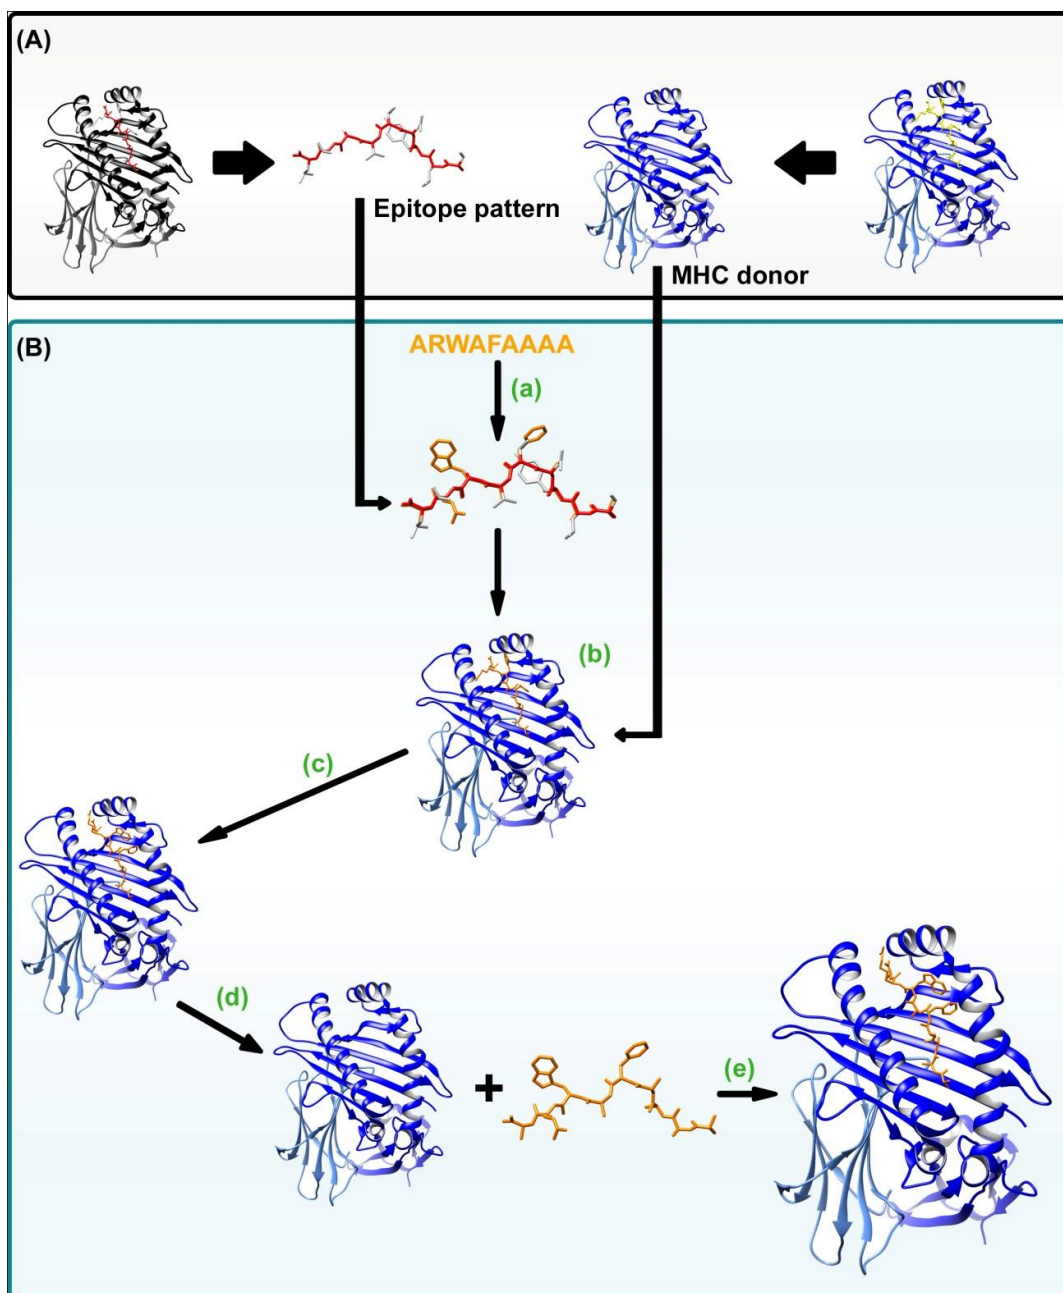

**Supplementary Table S1.** List of the 135 structures from PDB. Each structure was used to reproduce and validate DockTope, based on C $\alpha$  and all atoms RMSD values for the epitope.

| MHC-I Structure | PDB ID | Amino Acid Sequence | Sequence Length | RMSD (C $\alpha$ ) | RMSD (All atoms) |
|-----------------|--------|---------------------|-----------------|--------------------|------------------|
| HLA-A*02:01     | 1B0G   | ALWGFFPVL           | 9               | 1.349              | 2.446            |
| HLA-A*02:01     | 1DUZ   | LLFGYPVYV           | 9               | 0.996              | 2.739            |
| HLA-A*02:01     | 1EEY   | ILSALVGIV           | 9               | 0.557              | 1.053            |
| HLA-A*02:01     | 1EEZ   | ILSALVGIL           | 9               | 0.61               | 1.273            |
| HLA-A*02:01     | 1HHG   | TLTSCNTSV           | 9               | 1.082              | 2.391            |
| HLA-A*02:01     | 1I1F   | FLKEPVHGV           | 9               | 0.681              | 1.607            |
| HLA-A*02:01     | 1I1Y   | YLKEPVHGV           | 9               | 0.564              | 1.589            |
| HLA-A*02:01     | 1I7R   | FAPGFFPYL           | 9               | 1.532              | 3.575            |
| HLA-A*02:01     | 1I7T   | ALWGVFPVL           | 9               | 1.458              | 2.485            |
| HLA-A*02:01     | 1I7U   | ALWGFVPVL           | 9               | 0.836              | 1.566            |
| HLA-A*02:01     | 1QEW   | FLWGPRALV           | 9               | 0.907              | 2.038            |
| HLA-A*02:01     | 1QR1   | IISAVVGIL           | 9               | 1.39               | 2.053            |
| HLA-A*02:01     | 1S8D   | SLANTVATL           | 9               | 0.355              | 1.239            |
| HLA-A*02:01     | 1S9X   | SLLMWITQA           | 9               | 0.856              | 1.713            |
| HLA-A*02:01     | 1S9y   | SLLMWITQS           | 9               | 0.88               | 1.819            |
| HLA-A*02:01     | 1T1W   | SLFNTIAVL           | 9               | 0.327              | 1.409            |
| HLA-A*02:01     | 1T1X   | SLYLTVATL           | 9               | 0.417              | 1.239            |
| HLA-A*02:01     | 1T1Y   | SLYNVVATL           | 9               | 0.445              | 1.275            |
| HLA-A*02:01     | 1T1Z   | ALYNTAAAL           | 9               | 0.649              | 1.378            |
| HLA-A*02:01     | 1T20   | SLYNTIATL           | 9               | 0.453              | 1.395            |
| HLA-A*02:01     | 1TVB   | ITDQVPFSV           | 9               | 1.217              | 1.794            |
| HLA-A*02:01     | 1TVH   | IMDQVPFSV           | 9               | 1.093              | 1.813            |

|             |      |            |   |       |       |
|-------------|------|------------|---|-------|-------|
| HLA-A*02:02 | 2GIT | LLFGKPVYV  | 9 | 1.039 | 1.732 |
| HLA-A*02:01 | 2GTW | LAGIGILTV  | 9 | 3.129 | 3.419 |
| HLA-A*02:01 | 2GTZ | ALGIGILTV  | 9 | 1.435 | 1.493 |
| HLA-A*02:01 | 2V2W | SLYNTVATL  | 9 | 0.605 | 1.253 |
| HLA-A*02:01 | 2V2X | SLFNTVATL  | 9 | 1.384 | 2.403 |
| HLA-A*02:01 | 2VLL | GILGFVFTL  | 9 | 0.788 | 2.475 |
| HLA-A*02:01 | 2X4O | KLTPLCVTL  | 9 | 0.965 | 1.684 |
| HLA-A*02:01 | 2X4S | AMDSNTLEL  | 9 | 1.258 | 2.042 |
| HLA-A*02:01 | 2X4U | ILKEPVHGV  | 9 | 0.409 | 1.170 |
| HLA-A*02:01 | 3D25 | VLHDDLLEA  | 9 | 0.559 | 1.489 |
| HLA-A*02:01 | 3FQT | GLLGSPVRA  | 9 | 1.135 | 1.652 |
| HLA-A*02:01 | 3GSO | NLVPMVATV  | 9 | 0.603 | 1.337 |
| HLA-A*02:01 | 3GSQ | NLVPSVATV  | 9 | 0.522 | 0.959 |
| HLA-A*02:01 | 3GSR | NLVPVATV   | 9 | 0.535 | 1.033 |
| HLA-A*02:01 | 3GSU | NLVPTVATV  | 9 | 0.702 | 1.067 |
| HLA-A*02:01 | 3GSV | NLVPQVATV  | 9 | 0.439 | 0.996 |
| HLA-A*02:01 | 3GSW | NLVPMVA AV | 9 | 0.883 | 1.694 |
| HLA-A*02:01 | 3GSX | NLVPMVAVV  | 9 | 0.587 | 1.38  |
| HLA-A*02:01 | 3H7B | MLWGYLQYV  | 9 | 0.684 | 2.449 |
| HLA-A*02:01 | 3HPJ | RMFPNAPYL  | 9 | 1.111 | 1.492 |
| HLA-A*02:01 | 3I6G | GLMWLSYFV  | 9 | 0.463 | 3.124 |
| HLA-A*02:01 | 3KLA | SLLMWITQL  | 9 | 0.81  | 1.926 |
| HLA-A*02:01 | 3MR9 | NLVPAVATV  | 9 | 0.655 | 0.995 |
| HLA-A*02:01 | 3MRB | NLVPMVHTV  | 9 | 0.681 | 1.497 |
| HLA-A*02:01 | 3MRC | NLVPMCATV  | 9 | 1.63  | 2.613 |
| HLA-A*02:01 | 3MRD | NLVPMGATV  | 9 | 1.608 | 2.537 |
| HLA-A*02:01 | 3MRE | GLCPLVAML  | 9 | 1.093 | 2.092 |
| HLA-A*02:01 | 3MRG | CINGVCWTV  | 9 | 0.978 | 1.623 |

|             |      |            |   |       |       |
|-------------|------|------------|---|-------|-------|
| HLA-A*02:01 | 3MRH | CISGVCWTV  | 9 | 0.853 | 2.576 |
| HLA-A*02:01 | 3MRI | CINMWCWTV  | 9 | 1.481 | 3.778 |
| HLA-A*02:01 | 3MRJ | CINGMCWTV  | 9 | 0.667 | 1.106 |
| HLA-A*02:01 | 3MRK | PLFQVPEPV  | 9 | 0.696 | 1.299 |
| HLA-A*02:01 | 3MRL | CINGVVWTV  | 9 | 0.606 | 1.9   |
| HLA-A*02:01 | 3MYJ | YMFPNAPYL  | 9 | 1.659 | 1.858 |
| HLA-A*02:01 | 3PWJ | LLYGFVNYV  | 9 | 0.804 | 2.492 |
| HLA-A*02:01 | 3PWL | LGYGFVNYI  | 9 | 0.902 | 2.954 |
| HLA-A*02:01 | 3PWN | LLYGFVNYI  | 9 | 0.733 | 2.355 |
| HLA-A*02:01 | 3QFD | AAGIGILTV  | 9 | 1.377 | 1.421 |
| HLA-A*02:01 | 3REW | CLGGLLTMV  | 9 | 1.158 | 2.224 |
| HLA-A*02:01 | 3TO2 | LACFVLA AV | 9 | 1.006 | 2.79  |
| HLA-A*02:01 | 3V5D | KVAELVHFL  | 9 | 1.099 | 2.378 |
| HLA-A*02:01 | 3V5H | KVAEIVHFL  | 9 | 0.592 | 1.656 |
| HLA-A*02:01 | 3V5K | KVAELVWFL  | 9 | 0.837 | 1.973 |
| HLA-A*02:01 | 4I4W | ILAKFLHRL  | 9 | 1.219 | 3.494 |
| HLA-A*02:01 | 4K7F | VCWGELMNL  | 9 | 0.971 | 1.713 |
| HLA-A*02:01 | 4L3C | YLLMWITQV  | 9 | 1.003 | 2.273 |
| HLA-B*27:05 | 1HSA | ARAAAAAAA  | 9 | 0.622 | 0.635 |
| HLA-B*27:05 | 1JGE | GRFAAAIAK  | 9 | 0.557 | 0.894 |
| HLA-B*27:05 | 1OGT | RRKWRRWHL  | 9 | 0.928 | 2.518 |
| HLA-B*27:05 | 1UXS | RRRWRLTV   | 9 | 1.685 | 4.355 |
| HLA-B*27:05 | 1W0V | RRLPIFSRL  | 9 | 0.754 | 2.163 |
| HLA-B*27:05 | 2A83 | RRRWHRWRL  | 9 | 1.533 | 4.259 |
| HLA-B*27:05 | 2BSR | RRIYDLIEL  | 9 | 0.673 | 1.816 |
| HLA-B*27:05 | 2BST | SRYWAIRTR  | 9 | 0.686 | 2.637 |
| HLA-B*27:05 | 3BP4 | IRAAPPPLF  | 9 | 2.061 | 2.710 |
| HLA-B*27:05 | 3LV3 | SRRWRRWNR  | 9 | 0.774 | 2.994 |

|                       |      |           |   |       |       |
|-----------------------|------|-----------|---|-------|-------|
| H2-Db (9-mer epitope) | 1BZ9 | FAPGVFPYM | 9 | 1.693 | 2.757 |
| H2-Db (9-mer epitope) | 1CE6 | FAPGNYPAL | 9 | 1.225 | 1.822 |
| H2-Db (9-mer epitope) | 1FFO | AAVYNFATM | 9 | 0.852 | 1.694 |
| H2-Db (9-mer epitope) | 1FFP | SAVYNFATM | 9 | 1.009 | 1.462 |
| H2-Db (9-mer epitope) | 1FG2 | KAVYNFATC | 9 | 0.379 | 2.034 |
| H2-Db (9-mer epitope) | 1HOC | ASNENMETM | 9 | 0.744 | 1.658 |
| H2-Db (9-mer epitope) | 1INQ | SSVVGWYWL | 9 | 1.18  | 2.6   |
| H2-Db (9-mer epitope) | 1JPG | FQPQNGQFI | 9 | 0.5   | 1.109 |
| H2-Db (9-mer epitope) | 1JUF | SSVIGWYWL | 9 | 1.182 | 2.647 |
| H2-Db (9-mer epitope) | 1S7U | KAVYNFATM | 9 | 0.331 | 2.089 |
| H2-Db (9-mer epitope) | 1S7V | KAVYNLATM | 9 | 1.135 | 2.339 |
| H2-Db (9-mer epitope) | 1S7W | KALYNFATM | 9 | 0.271 | 2.064 |
| H2-Db (9-mer epitope) | 1S7X | KAVFNFATM | 9 | 0.371 | 1.727 |
| H2-Db (9-mer epitope) | 1ZHB | KALYNYAPI | 9 | 0.291 | 2.09  |
| H2-Db (9-mer epitope) | 2ZOK | ASLWNGPHL | 9 | 0.592 | 1.226 |
| H2-Db (9-mer epitope) | 3CC5 | KVPRNQDWL | 9 | 0.308 | 1.856 |
| H2-Db (9-mer epitope) | 3CCH | EGSRNQDWL | 9 | 0.495 | 2.288 |
| H2-Db (9-mer epitope) | 3CH1 | EGPRNQDWL | 9 | 0.656 | 2.214 |
| H2-Db (9-mer epitope) | 3CPL | ASNENAETM | 9 | 0.845 | 1.769 |
| H2-Db (9-mer epitope) | 3FTG | ASAENMETM | 9 | 0.912 | 1.518 |
| H2-Db (9-mer epitope) | 3QUK | KAVANFATM | 9 | 0.454 | 1.742 |
| H2-Db (9-mer epitope) | 3QUL | KAVSNFATM | 9 | 0.377 | 1.489 |
| H2-Db (9-mer epitope) | 3TBS | KAPANFATM | 9 | 0.47  | 1.893 |
| H2-Db (9-mer epitope) | 3TBT | KAPSNFATM | 9 | 0.336 | 1.536 |
| H2-Db (9-mer epitope) | 3TBV | KGPANFATM | 9 | 0.653 | 1.912 |
| H2-Db (9-mer epitope) | 3TBW | KGPSNFATM | 9 | 0.781 | 1.890 |
| H2-Db (9-mer epitope) | 3TBY | KAPFNFATM | 9 | 0.436 | 2.288 |
| H2-Db (9-mer epitope) | 4HUU | ASNENIETM | 9 | 0.695 | 2.005 |

|                        |      |            |    |       |       |
|------------------------|------|------------|----|-------|-------|
| H2-Db (9-mer epitope)  | 4HUV | ASNENWETM  | 9  | 0.64  | 1.792 |
| H2-Db (9-mer epitope)  | 4HUW | ASNENTETM  | 9  | 0.537 | 1.72  |
| H2-Db (9-mer epitope)  | 4L8C | ASDENMETM  | 9  | 0.639 | 1.517 |
| H2-Db (9-mer epitope)  | 4L8D | ASNEDMETM  | 9  | 0.537 | 1.506 |
| H2-Db (9-mer epitope)  | 4NSK | KAPYNFATM  | 9  | 0.629 | 2.416 |
| H2-Db (10-mer epitope) | 1N3N | SALQNAASIA | 10 | 0.855 | 1.395 |
| H2-Db (10-mer epitope) | 1WBX | SQLKNNAKEI | 10 | 0.441 | 1.685 |
| H2-Db (10-mer epitope) | 1YN6 | SSLENFRAYV | 10 | 0.315 | 2.54  |
| H2-Db (10-mer epitope) | 1YN7 | SSLENFAAYV | 10 | 0.233 | 0.937 |
| H2-Db (10-mer epitope) | 3L3H | SSLENARAYV | 10 | 0.355 | 1.822 |
| H2-Kb                  | 1G7Q | SAPDTRPA   | 8  | 0.824 | 2.678 |
| H2-Kb                  | 1KJ3 | KVITFIDL   | 8  | 1.322 | 2.298 |
| H2-Kb                  | 1LEG | EQYKFYSV   | 8  | 0.836 | 2.494 |
| H2-Kb                  | 1LK2 | GNYSFYAL   | 8  | 0.653 | 1.778 |
| H2-Kb                  | 1RK0 | SSIEFARL   | 8  | 0.692 | 1.601 |
| H2-Kb                  | 1RK1 | SEIEFARL   | 8  | 0.658 | 1.504 |
| H2-Kb                  | 1VAC | SIINFEKL   | 8  | 0.416 | 1.455 |
| H2-Kb                  | 2CLV | SQYYYNSL   | 8  | 1.292 | 2.128 |
| H2-Kb                  | 2CLZ | INFDNTI    | 8  | 1.442 | 1.849 |
| H2-Kb                  | 2FO4 | SAPDFRPL   | 8  | 0.787 | 2.494 |
| H2-Kb                  | 3FOL | VNDIFERI   | 8  | 1.521 | 2.35  |
| H2-Kb                  | 3FON | VNDIFEAI   | 8  | 1.216 | 2.153 |
| H2-Kb                  | 3TID | AVYNFATM   | 8  | 1.367 | 2.135 |
| H2-Kb                  | 3TIE | AIVNYANL   | 8  | 1.25  | 1.438 |
| H2-Kb                  | 3P4M | YTVKYPNL   | 8  | 1.544 | 2.563 |
| H2-Kb                  | 3P4N | YTVKFPNM   | 8  | 1.604 | 2.172 |
| H2-Kb                  | 3P4O | YTAKYPNL   | 8  | 1.431 | 2.415 |
| H2-Kb                  | 3P9M | SIIGFEKL   | 8  | 1.341 | 1.559 |

H2-Kb

3PAB

EIINFEKL

8

1.312

2.392

---

**Mean ± SD**

**0.882 Å ± 0.437 Å    1.964 Å ± 0.655 Å**

---
